# Supplementary material for: Secretome Analysis Defines the Major Role of SecDF in Staphylococcus aureus Virulence
Source: PubMed Central journal article supplement (PMC3643904; doi:10.1371/journal.pone.0063513), 2013-05-03
Supplement: pone.0063513.s001.pdf [file pone.0063513.s001.pdf]

**Supplemental Table S1.** Proteins found in the supernatant of *S. aureus* Newman (wt) and the mutant Newman  $\Delta secDF$  (*secDF*) and their predicted localization.

| NWMN | Protein name                                                | Gene         | wt                  |       |        |       | <i>secDF</i>   |                 |                  |                 | $\sigma$ wt | $\sigma$ <i>secDF</i> | P   | SignalP<br>[1] | Sec SP<br>[2] | No SP(*)<br>[2] | SecretomeP<br>[3] | Localization [4,5]                  |                   |
|------|-------------------------------------------------------------|--------------|---------------------|-------|--------|-------|----------------|-----------------|------------------|-----------------|-------------|-----------------------|-----|----------------|---------------|-----------------|-------------------|-------------------------------------|-------------------|
|      |                                                             |              | wt I                | wt II | wt III | wt IV | <i>secDF</i> I | <i>secDF</i> II | <i>secDF</i> III | <i>secDF</i> IV |             |                       |     |                |               |                 |                   |                                     |                   |
|      |                                                             |              | fold change (log 2) |       |        |       |                |                 |                  |                 |             |                       |     |                |               |                 |                   |                                     |                   |
| 0002 | DNA polymerase III subunit beta                             | <i>dnaN</i>  | 0                   | 0.16  |        |       | 0.01           | -0.13           |                  |                 | 0.08        | -0.06                 |     |                |               |                 |                   | Cytoplasm                           |                   |
| 0014 | 50S ribosomal protein L9                                    | <i>rplI</i>  | 0                   | -0.51 |        |       | -0.61          | -0.95           |                  |                 | -0.26       | -0.78                 |     |                |               |                 | Yes               | Cytoplasm                           |                   |
| 0030 | Probable tRNA-dihydrouridine synthase                       | <i>dus</i>   | 0                   | -0.12 |        |       | -0.99          | -0.32           |                  |                 | -0.06       | -0.66                 |     |                |               |                 |                   | Cytoplasm                           |                   |
| 0055 | Immunoglobulin G-binding protein A                          | <i>spa</i>   | 0                   | -0.37 | 0      | -0.29 | -3.01          | -3.10           | -2.40            | -2.52           | -0.16       | -2.76                 | *** | Yes            | Yes           |                 | Yes               | Cell wall                           | Sortase substrate |
| 0113 | Putative aldehyde dehydrogenase                             | <i>aldA</i>  | 0                   | 0.16  | 0      | -0.24 | -0.15          | -0.78           | -0.46            | -0.56           | -0.02       | -0.49                 | *   |                |               |                 |                   | Cytoplasm                           |                   |
| 0129 | Ornithine aminotransferase 2                                | <i>argD</i>  | 0                   | 0.05  | 0      | -0.56 | -0.34          | -0.44           | -0.68            | -1.10           | -0.13       | -0.64                 |     |                |               |                 |                   | Cytoplasm                           |                   |
| 0166 | Staphylocoagulase                                           | <i>coa</i>   | 0                   | 0.14  | 0      | 0.08  | -4.33          | -3.91           | -2.61            | -3.26           | 0.06        | -3.53                 | **  | Yes            | Yes           |                 | Yes               | Extracellular                       |                   |
| 0172 | Putative zinc metalloprotease                               | <i>0172</i>  | 0                   | 0.10  |        |       | -0.67          | -0.65           |                  |                 | 0.05        | -0.66                 | *   |                |               |                 | Yes               | Membrane                            |                   |
| 0189 | 2-C-methyl-D-erythritol 4-phosphate cytidylyl-transferase 2 | <i>ispD2</i> | 0                   | 0.17  |        |       | -0.06          | -0.35           |                  |                 | 0.08        | -0.21                 |     |                |               |                 |                   | Unknown                             |                   |
| 0210 | Glycyl-glycine endopeptidase                                | <i>lytM</i>  | 0                   | 0.03  | 0      | -0.35 | 2.00           | 2.06            | 1.72             | 1.34            | -0.08       | 1.78                  | *** | Yes            | Yes           |                 | Yes               | Extracellular                       |                   |
| 0249 | 5'-nucleotidase, lipoprotein e (P4)                         | <i>0249</i>  | 0                   | -0.27 | 0      | 0.22  | -2.22          | -2.16           | -1.58            | -1.75           | -0.01       | -1.93                 | *** | Yes            | Yes           |                 | Yes               | Extracellular                       |                   |
| 0262 | Lipase 2                                                    | <i>geh</i>   | 0                   | -0.18 | 0      | -0.19 | -2.93          | -2.92           | -1.63            | -1.75           | -0.09       | -2.31                 | **  | Yes            | Yes           |                 | Yes               | Extracellular                       |                   |
| 0357 | 30S ribosomal protein S6                                    | <i>rpsF</i>  | 0                   | -0.14 | 0      | -0.24 | -0.36          | -0.22           | 0.20             | -0.09           | -0.09       | -0.12                 |     |                |               |                 |                   | Cytoplasm                           |                   |
| 0371 | Alkyl hydroperoxide reductase subunit F                     | <i>ahpF</i>  | 0                   | -0.19 | 0      | -0.66 | -0.47          | -0.70           | -0.86            | -1.08           | -0.21       | -0.78                 | *   |                |               | x               |                   | Cytoplasm                           |                   |
| 0372 | Alkyl hydroperoxide reductase subunit C                     | <i>ahpC</i>  | 0                   | 0.13  | 0      | -0.34 | -0.05          | -0.37           | -0.07            | -0.39           | -0.05       | -0.22                 |     |                |               | x               | Yes               | Cytoplasm                           |                   |
| 0375 | Conserved hypothetical protein                              | <i>0375</i>  | 0                   | -0.32 |        |       | -1.06          | -1.05           |                  |                 | -0.16       | -1.06                 |     |                |               |                 | Yes               | Cytoplasm                           |                   |
| 0377 | Conserved hypothetical protein                              | <i>0377</i>  | 0                   | 0.00  | 0      | -0.46 | -0.59          | -0.81           | -0.50            | -0.52           | -0.12       | -0.60                 | *   |                |               |                 | Yes               | Cytoplasm                           |                   |
| 0380 | Inosine-5'-monophosphate dehydrogenase                      | <i>guaB</i>  | 0                   | -0.06 | 0      | -0.01 | 0.02           | -0.05           | -0.40            | -0.57           | -0.02       | -0.25                 |     |                |               | x               |                   | Cytoplasm                           |                   |
| 0381 | GMP synthase [glutamine-hydrolyzing]                        | <i>guaA</i>  | 0                   | -0.20 |        |       | -0.31          | -0.63           |                  |                 | -0.10       | -0.47                 |     |                |               | x               |                   | Cytoplasm                           |                   |
| 0429 | N-acetylmuramoyl-L-alanine amidase                          | <i>sle1</i>  | 0                   | -0.38 | 0      | 0.51  | -1.45          | -0.92           | -0.12            | -1.05           | 0.03        | -0.89                 | *   | Yes            | Yes           |                 | Yes               | Cell wall, non-cov. LysM domain [6] |                   |
| 0443 | Conserved hypothetical protein                              | <i>0443</i>  | 0                   | -0.07 |        |       | -0.27          | -0.39           |                  |                 | -0.03       | -0.33                 |     |                |               |                 |                   | Unknown                             |                   |
| 0453 | Methionyl-tRNA synthetase                                   | <i>metS</i>  | 0                   | -0.33 | 0      | -0.05 | -0.87          | -1.20           | -0.35            | -0.74           | -0.09       | -0.79                 | *   |                |               |                 |                   | Cytoplasm                           |                   |
| 0463 | Ribose-phosphate pyrophosphokinase                          | <i>prs</i>   | 0                   | 0.36  |        |       | 0.37           | -0.04           |                  |                 | 0.18        | 0.17                  |     |                |               |                 |                   | Cytoplasm                           |                   |
| 0464 | 50S ribosomal protein L25                                   | <i>rplY</i>  | 0                   | 0.07  | 0      | -0.56 | 0.37           | 0.19            | -0.21            | -0.01           | -0.12       | 0.08                  |     |                |               |                 |                   | Cytoplasm                           |                   |
| 0472 | Hypoxanthine-guanine phosphoribosyl-transferase             | <i>hpt</i>   | 0                   | 0.48  | 0      | -0.65 | 0.11           | 0.44            | 2.31             | 1.36            | -0.04       | 1.06                  |     |                |               |                 |                   | Cytoplasm                           |                   |
| 0475 | Cysteine synthase homolog                                   | <i>cysK</i>  | 0                   | 0.06  | 0      | -0.08 | -0.37          | -0.45           | -0.29            | -0.44           | -0.01       | -0.39                 | *** |                |               |                 |                   | Cytoplasm                           |                   |
| 0479 | Lysyl-tRNA synthetase                                       | <i>lysS</i>  | 0                   | -0.25 |        |       | -0.56          | -0.42           |                  |                 | -0.12       | -0.49                 |     |                |               |                 |                   | Cytoplasm                           |                   |
| 0481 | Pyridoxal biosynthesis lyase                                | <i>pdxS</i>  | 0                   | -0.28 | 0      | -1.02 | -0.44          | -0.39           | -0.32            | -0.85           | -0.33       | -0.50                 |     |                |               |                 |                   | Cytoplasm                           |                   |
| 0482 | Glutamine amidotransferase subunit                          | <i>pdxT</i>  | 0                   | -0.47 |        |       | -0.26          | -0.18           |                  |                 | -0.23       | -0.22                 |     |                |               |                 |                   | Cytoplasm                           |                   |
| 0487 | ATP-dependent Clp protease, ATP-binding subunit ClpC        | <i>clpC</i>  | 0                   | 0.40  | 0      | -0.17 | -0.05          | 0.02            | -0.28            | -0.44           | 0.06        | -0.19                 |     |                |               | x               |                   | Cytoplasm                           |                   |
| 0490 | Glutamyl-tRNA synthetase                                    | <i>gltX</i>  | 0                   | 0.61  | 0      | -0.54 | 0.01           | -0.17           | -0.44            | -0.91           | 0.02        | -0.38                 |     |                |               | x               |                   | Cytoplasm                           |                   |
| 0498 | Transcription antitermination protein                       | <i>nusG</i>  | 0                   | 0.13  |        |       | -0.32          | -0.39           |                  |                 | 0.06        | -0.35                 |     |                |               |                 |                   | Cytoplasm                           |                   |
| 0499 | 50S ribosomal protein L11                                   | <i>rplK</i>  | 0                   | 0.15  | 0      | -0.26 | 0.21           | 0.23            | 0.13             | 0.31            | -0.03       | 0.22                  |     |                |               |                 |                   | Cytoplasm                           |                   |
| 0500 | 50S ribosomal protein L1                                    | <i>rplA</i>  | 0                   | 0.23  | 0      | -0.25 | 0.12           | -0.16           | 0.06             | -0.14           | 0.00        | -0.03                 |     |                |               |                 | Yes               | Cytoplasm                           |                   |
| 0501 | 50S ribosomal protein L10                                   | <i>rplJ</i>  | 0                   | 0.06  | 0      | -0.48 | 0.09           | -0.04           | 0.00             | 0.04            | -0.10       | 0.02                  |     |                |               |                 |                   | Cytoplasm                           |                   |

| NWMN | Protein name                                                | Gene           | fold change (log 2) |       |        |       |         |          |           |          |       |         | P     | SignalP<br>[1] | Sec SP<br>[2] | No SP(*)<br>[2] | SecretomeP<br>[3] | Localization [4,5] |                    |                                 |
|------|-------------------------------------------------------------|----------------|---------------------|-------|--------|-------|---------|----------|-----------|----------|-------|---------|-------|----------------|---------------|-----------------|-------------------|--------------------|--------------------|---------------------------------|
|      |                                                             |                | wt I                | wt II | wt III | wt IV | secDF I | secDF II | secDF III | secDF IV | σ wt  | σ secDF |       |                |               |                 |                   |                    |                    |                                 |
| 0502 | 50S ribosomal protein L7/L12                                | <i>rplL</i>    | 0                   | 0.06  | 0      | -0.36 | 0.30    | -0.02    | -0.07     | -0.12    | -0.07 | 0.02    |       |                |               |                 |                   |                    | Cytoplasm          |                                 |
| 0504 | DNA-directed RNA polymerase subunit beta                    | <i>rpoB</i>    | 0                   | 0.03  |        |       | -0.30   | -0.29    |           |          |       | 0.01    | -0.30 | *              |               |                 |                   |                    | Cytoplasm          |                                 |
| 0505 | DNA-directed RNA polymerase subunit beta'                   | <i>rpoC</i>    | 0                   | 0.16  | 0      | -0.34 | -0.41   | -0.49    | 0.07      | -0.48    | -0.05 | -0.33   |       |                |               |                 |                   |                    | Cytoplasm          |                                 |
| 0508 | 30S ribosomal protein S7                                    | <i>rpsG</i>    | 0                   | -0.38 | 0      | -0.70 | 0.42    | 0.36     | -0.40     | -0.24    | -0.27 | 0.03    |       |                |               |                 |                   |                    | Cytoplasm          |                                 |
| 0509 | Elongation factor G                                         | <i>fus</i>     | 0                   | 0.06  | 0      | -0.38 | 0.33    | 0.26     | -0.63     | -0.51    | -0.08 | -0.14   |       |                |               | x               |                   |                    | Cytoplasm          |                                 |
| 0510 | Elongation factor Tu                                        | <i>tufA</i>    | 0                   | -0.05 | 0      | -0.21 | 0.77    | 0.65     | 0.67      | 0.72     | -0.07 | 0.71    | ***   |                |               |                 | x                 |                    | Cytoplasm          |                                 |
| 0512 | Conserved hypothetical protein                              | <i>0512</i>    | 0                   | -0.12 |        |       | -0.53   | -0.89    |           |          |       | -0.06   | -0.71 |                |               |                 |                   |                    | Cytoplasm          |                                 |
| 0513 | Similar to chaperone protein HchA                           | <i>hchA</i>    | 0                   | -0.27 | 0      | -0.44 | 0.05    | -0.01    | -0.38     | -0.39    | -0.18 | -0.18   |       |                |               |                 | Yes               |                    | Cytoplasm          |                                 |
| 0516 | Probable branched-chain-amino-acid amino-transferase        | <i>ilvE</i>    | 0                   | 0.11  | 0      | -0.32 | 0.49    | 0.02     | -0.51     | -0.65    | -0.05 | -0.16   |       |                |               |                 |                   |                    | Cytoplasm          |                                 |
| 0525 | Serine-aspartate repeat-containing protein E                | <i>sdrE</i>    | 0                   | -0.08 | 0      | -0.44 | -0.92   | -1.00    | -0.81     | -1.03    | -0.13 | -0.94   | **    | Yes            | Pot.          |                 |                   | Yes                | Cell wall          | Sortase substrate               |
| 0533 | 3-hexulose-6-phosphate synthase                             | <i>0533</i>    | 0                   | -0.32 | 0      | -0.52 | 0.05    | -0.16    | 0.37      | -0.09    | -0.21 | 0.04    |       |                |               |                 |                   |                    | Cytoplasm          |                                 |
| 0550 | Conserved hypothetical protein                              | <i>0550</i>    | 0                   | -0.03 | 0      | 0.56  | 0.62    | -0.56    | 0.86      | 0.71     | 0.13  | 0.41    |       |                |               |                 |                   |                    | Unknown            |                                 |
| 0551 | Phosphate acetyltransferase                                 | <i>pta</i>     | 0                   | 0.02  | 0      | -0.39 | -0.21   | -0.51    | -0.53     | -0.43    | -0.09 | -0.42   | *     |                |               |                 | x                 |                    | Cytoplasm          |                                 |
| 0579 | Arginyl-tRNA synthetase                                     | <i>argS</i>    | 0                   | 0.31  |        |       | -1.65   | -0.87    |           |          | 0.16  | -1.26   |       |                |               |                 |                   |                    | Cytoplasm          |                                 |
| 0588 | Transcriptional regulator                                   | <i>sarA</i>    | 0                   | 0.00  |        |       | -0.03   | -0.26    |           |          | 0.00  | -0.15   |       |                |               |                 |                   |                    | Cytoplasm          |                                 |
| 0655 | MarR family regulatory protein                              | <i>mgrA</i>    | 0                   | -0.29 |        |       | 0.01    | -0.22    |           |          | -0.14 | -0.10   |       |                |               |                 |                   | Yes                | Cytoplasm          |                                 |
| 0687 | Glycerol phosphate lipoteichoic acid synthase               | <i>ltaS</i>    | 0                   | 0.04  | 0      | -0.15 | -0.70   | -0.69    | -0.69     | -0.75    | -0.03 | -0.71   | ***   |                |               |                 |                   | Yes                | Membrane           |                                 |
| 0721 | Ribosomal protein S30EA                                     | <i>0721</i>    | 0                   | -0.35 |        |       | -0.67   | -0.55    |           |          | -0.18 | -0.61   |       |                |               |                 | x                 |                    | Cytoplasm          |                                 |
| 0732 | Thioredoxin reductase                                       | <i>trxB</i>    | 0                   | 0.27  |        |       | -0.06   | -0.15    |           |          | 0.14  | -0.11   |       |                |               |                 | x                 |                    | Cytoplasm          |                                 |
| 0736 | ATP-dependent Clp protease, ATP-binding subunit ClpP        | <i>clpP</i>    | 0                   | -0.33 |        |       | -0.36   | -0.69    |           |          | -0.16 | -0.53   |       |                |               |                 | x                 |                    | Cytoplasm          |                                 |
| 0741 | Glyceraldehyde-3-phosphate dehydrogenase 1                  | <i>gapA</i>    | 0                   | 0.00  | 0      | -0.14 | 0.78    | 0.55     | 0.43      | 0.97     | -0.03 | 0.68    | **    |                |               |                 | x                 |                    | Cytoplasm          |                                 |
| 0742 | Phosphoglycerate kinase                                     | <i>pgk</i>     | 0                   | 0.05  | 0      | 0.04  | 0.23    | 0.08     | -0.07     | -0.39    | 0.02  | -0.04   |       |                |               |                 | x                 |                    | Cytoplasm          |                                 |
| 0743 | Triosephosphate isomerase                                   | <i>tpi</i>     | 0                   | -0.18 | 0      | -0.45 | 0.31    | 0.24     | -0.36     | 0.19     | -0.16 | 0.09    |       |                |               |                 | x                 |                    | Cytoplasm          |                                 |
| 0744 | 2,3-bisphosphoglycerate-independent phosphoglycerate mutase | <i>pgm</i>     | 0                   | -0.71 |        |       | -3.04   | -3.31    |           |          | -0.35 | -3.17   |       |                |               |                 | x                 |                    | Cytoplasm          |                                 |
| 0745 | Enolase                                                     | <i>eno</i>     | 0                   | -0.13 | 0      | -0.14 | -0.01   | -0.23    | -0.38     | -0.28    | -0.07 | -0.23   |       |                |               |                 | x                 |                    | Cytoplasm          | MLS                             |
| 0756 | Clumping factor A                                           | <i>clfA</i>    | 0                   | 0.13  | 0      | -0.23 | -1.48   | -1.55    | -1.34     | -1.34    | -0.02 | -1.42   | ***   | Yes            | Yes           |                 |                   | Yes                | Cell wall          | Sortase substrate               |
| 0758 | Extracellular matrix protein                                | <i>emp/ssp</i> | 0                   | -0.04 | 0      | -0.36 | -3.18   | -3.05    | -2.68     | -3.00    | -0.10 | -2.98   | ***   | Yes            | Yes           |                 |                   | Yes                | Extracellular / CW | Can re-bind to CW, non-cov. [7] |
| 0776 | Glycine cleavage system H protein                           | <i>gcvH</i>    | 0                   | -0.20 | 0      | -0.52 | 0.10    | -0.11    | -0.25     | -0.42    | -0.18 | -0.17   |       |                |               |                 |                   |                    | Cytoplasm          |                                 |
| 0783 | CsbD-like superfamily protein                               | <i>0783</i>    | 0                   | -0.06 | 0      | -0.29 | -0.75   | -0.87    | -0.14     | -0.83    | -0.09 | -0.65   | *     |                |               |                 |                   | Yes                | Unknown            |                                 |
| 0800 | Hydrolase                                                   | <i>nagD</i>    | 0                   | 0.14  | 0      | -0.08 | -0.29   | -0.68    | -0.33     | -0.42    | 0.02  | -0.43   | **    |                |               |                 |                   | Yes                | Unknown            |                                 |
| 0803 | D-alanine-D-alanyl carrier protein ligase                   | <i>dltA</i>    | 0                   | -0.15 |        |       | 0.02    | -0.24    |           |          | -0.08 | -0.11   |       |                |               |                 |                   |                    | Cytoplasm          |                                 |
| 0805 | D-alanyl carrier protein                                    | <i>dltC</i>    | 0                   | -0.26 | 0      | -0.31 | 0.11    | 0.12     | 0.00      | 0.48     | -0.14 | 0.18    |       |                |               |                 |                   |                    | Cytoplasm          |                                 |
| 0824 | Putative peptidyl-prolyl cis-trans isomerase                | <i>ppi</i>     | 0                   | -0.24 | 0      | -0.19 | 0.06    | -0.25    | 0.01      | -0.38    | -0.11 | -0.14   |       |                |               |                 |                   | Yes                | Cytoplasm          |                                 |
| 0833 | Glucose-6-phosphate isomerase                               | <i>pgi</i>     | 0                   | -0.19 | 0      | -0.13 | -0.70   | -0.51    | -0.26     | -0.26    | -0.08 | -0.43   | *     |                |               |                 | x                 |                    | Cytoplasm          |                                 |
| 0836 | Signal peptidase IB                                         | <i>spsB</i>    | 0                   | -0.51 |        |       | -0.77   | -0.08    |           |          | -0.26 | -0.43   |       |                |               |                 |                   | Yes                | Membrane           | MLS                             |
| 0839 | Fumarylacetylacetate hydrolase family protein               | <i>0839</i>    | 0                   | -0.02 | 0      | -0.32 | 0.11    | 0.15     | -0.15     | -0.15    | -0.09 | -0.01   |       |                |               |                 |                   | Yes                | Cytoplasm          |                                 |

| NWMN | Protein name                                                                             | Gene           | wt I | wt II | wt III | wt IV | fold change (log 2) |          |           |          | σ wt  | σ secDF | P   | SignalP<br>[1] | Sec SP<br>[2] | No SP(*)<br>[2] | SecretomeP<br>[3] | Localization [4,5] |                    |                                 |
|------|------------------------------------------------------------------------------------------|----------------|------|-------|--------|-------|---------------------|----------|-----------|----------|-------|---------|-----|----------------|---------------|-----------------|-------------------|--------------------|--------------------|---------------------------------|
|      |                                                                                          |                |      |       |        |       | secDF I             | secDF II | secDF III | secDF IV |       |         |     |                |               |                 |                   |                    |                    |                                 |
| 0845 | Chaperone protein                                                                        | <i>clpB</i>    | 0    | -0.38 | 0      | -0.01 | 0.20                | -0.09    | -2.34     | -2.73    | -0.10 | -1.24   |     |                |               |                 |                   |                    | Cytoplasm          |                                 |
| 0854 | 3-oxoacyl-[acyl-carrier-protein] synthase 2                                              | <i>fabF</i>    | 0    | 0.00  | 0      | -0.63 | 0.44                | 0.63     | -0.27     | -0.36    | -0.16 | 0.11    |     |                |               |                 |                   |                    | Cytoplasm          |                                 |
| 0885 | 2', 5' RNA ligase                                                                        | <i>0885</i>    | 0    | -0.04 | 0      | -0.09 | -0.33               | -0.33    | -0.44     | -0.33    | -0.03 | -0.36   | *** |                |               |                 |                   |                    | Cytoplasm          |                                 |
| 0915 | 1,4-Dihydroxy-2-naphthoyl-CoA synthase                                                   | <i>memB</i>    | 0    | 0.22  | 0      | -0.51 | -0.18               | -0.32    | -0.27     | -0.30    | -0.07 | -0.27   |     |                |               |                 |                   |                    | Cytoplasm          |                                 |
| 0917 | Cysteine protease                                                                        | <i>sspB</i>    | 0    | -0.02 | 0      | -0.22 | -1.38               | -1.33    | -0.65     | -1.14    | -0.06 | -1.13   | **  | Yes            | Yes           |                 | Yes               |                    | Extracellular      |                                 |
| 0918 | V8 protease, glutamyl endopeptidase precursor                                            | <i>sspA</i>    | 0    | -0.16 |        |       | -1.19               | -1.64    |           |          | -0.08 | -1.41   |     | Yes            | Yes           |                 | Yes               |                    | Extracellular      |                                 |
| 0922 | Bifunctional autolysin                                                                   | <i>atl</i>     | 0    | 1.21  | 0      | -0.34 | 1.67                | 0.91     | 0.19      | 0.12     | 0.22  | 0.72    |     | Yes            | Yes           |                 | Yes               |                    | Extracellular      |                                 |
| 0925 | Similar to cell envelope-related transcriptional attenuator                              | <i>0925</i>    | 0    | -0.25 | 0      | -0.54 | -1.27               | -1.31    | -1.28     | -1.90    | -0.20 | -1.44   | *** | Yes            |               | x               | Yes               |                    | Membrane           | predicted uncleaved SP          |
| 0930 | Probable quinol oxidase subunit 2                                                        | <i>qoxA</i>    | 0    | -0.11 |        |       | -0.88               | -0.94    |           |          | -0.06 | -0.91   | *   |                |               |                 | Yes               |                    | Membrane           |                                 |
| 0932 | Bifunctional protein folD                                                                | <i>folD</i>    | 0    | -0.17 |        |       | -0.40               | -0.18    |           |          | -0.09 | -0.29   |     |                |               |                 |                   |                    | Cytoplasm          |                                 |
| 0949 | Histidine-containing phosphocarrier protein                                              | <i>ptsH</i>    | 0    | -0.20 | 0      | -0.38 | 0.24                | -0.01    | -0.22     | -0.15    | -0.14 | -0.04   |     |                |               | x               |                   |                    | Cytoplasm          |                                 |
| 0950 | Phosphoenolpyruvate-protein phosphotransferase                                           | <i>ptsI</i>    | 0    | -0.24 | 0      | -0.46 | 0.04                | 0.06     | -0.42     | -0.73    | -0.17 | -0.26   |     |                |               | x               |                   |                    | Cytoplasm          |                                 |
| 0959 | Pyruvate dehydrogenase E1 component subunit alpha                                        | <i>phdA</i>    | 0    | -0.05 | 0      | -0.52 | 0.05                | -0.22    | -0.29     | -0.63    | -0.14 | -0.27   |     |                |               | x               |                   |                    | Cytoplasm          |                                 |
| 0960 | Pyruvate dehydrogenase E1 component subunit beta                                         | <i>phdB</i>    | 0    | -0.07 | 0      | -0.28 | 0.20                | -0.04    | 0.00      | -0.10    | -0.09 | 0.01    |     |                |               | x               |                   |                    | Cytoplasm          |                                 |
| 0961 | Dihydropolyllysine-residue acetyltransferase component of pyruvate dehydrogenase complex | <i>pdhC</i>    | 0    | 0.08  | 0      | -0.35 | 0.02                | -0.11    | -0.13     | -0.37    | -0.07 | -0.15   |     |                |               | x               |                   |                    | Cytoplasm          |                                 |
| 0962 | Dihydropolyl dehydrogenase                                                               | <i>pdhD</i>    | 0    | -0.21 | 0      | 0.02  | -0.39               | -0.56    | -0.24     | -0.31    | -0.05 | -0.37   | *   |                |               | x               |                   |                    | Cytoplasm          |                                 |
| 1019 | Putative major head protein Orf47                                                        | <i>1019</i>    | 0    | 0.12  |        |       | -1.65               | -1.53    |           |          | 0.06  | -1.59   | **  |                |               |                 |                   |                    | Cytoplasm          |                                 |
| 1041 | Iron-regulated surface determinant protein A                                             | <i>isdA</i>    | 0    | -0.08 | 0      | -0.26 | -0.53               | -0.64    | -0.31     | -0.59    | -0.08 | -0.51   | **  | Yes            | Yes           |                 | Yes               |                    | Cell wall          | Sortase substrate               |
| 1057 | Thioredoxin                                                                              | <i>trxA</i>    | 0    | -0.11 | 0      | -0.35 | 0.79                | 0.56     | 0.18      | -0.01    | -0.12 | 0.38    |     |                |               |                 |                   |                    | Cytoplasm          |                                 |
| 1067 | FPRL1 inhibitory protein / FLIPr                                                         | <i>flr</i>     | 0    | -0.16 | 0      | -0.31 | -4.07               | -3.87    | -3.04     | -3.25    | -0.12 | -3.56   | *** | Yes            | Yes           |                 | Yes               |                    | Extracellular      |                                 |
| 1069 | Fibrinogen-binding protein                                                               | <i>efb/fib</i> | 0    | 0.27  | 0      | 0.09  | -1.49               | -1.11    | -1.38     | -1.34    | 0.09  | -1.33   | *** | Yes            | Yes           |                 | Yes               |                    | Extracellular / CW | Can re-bind to CW, non-cov. [7] |
| 1073 | Alpha-hemolysin                                                                          | <i>hla</i>     | 0    | 0.02  | 0      | -0.46 | -1.16               | -1.44    | -0.67     | -0.97    | -0.11 | -1.06   | **  | Yes            | Yes           |                 | Yes               |                    | Extracellular      |                                 |
| 1086 | Uncharacterized N-acetyltransferase                                                      | <i>1086</i>    | 0    | 0.07  |        |       | -0.68               | -0.54    |           |          | 0.04  | -0.61   | *   |                |               |                 |                   |                    | Unknown            |                                 |
| 1096 | Cell division protein                                                                    | <i>ftsZ</i>    | 0    | -0.19 | 0      | -0.60 | -0.29               | -0.16    | -0.47     | -0.24    | -0.20 | -0.29   |     |                |               |                 |                   |                    | Cytoplasm          |                                 |
| 1103 | Isoleucyl-tRNA synthetase OS                                                             | <i>ileS</i>    | 0    | 0.08  | 0      | -0.19 | -0.45               | -0.44    | -0.12     | -0.51    | -0.03 | -0.38   | *   |                |               | x               |                   |                    | Cytoplasm          |                                 |
| 1125 | Peptide deformylase                                                                      | <i>def</i>     | 0    | -0.60 |        |       | -0.34               | -0.79    |           |          | -0.30 | -0.57   |     |                |               |                 |                   |                    | Cytoplasm          |                                 |
| 1139 | Phosphate acyltransferase                                                                | <i>plsX</i>    | 0    | 1.27  |        |       | -0.86               | 0.15     |           |          | 0.63  | -0.36   |     |                |               |                 |                   |                    | Cytoplasm          |                                 |
| 1140 | Malonyl CoA-acyl carrier protein transacylase                                            | <i>fabD</i>    | 0    | -0.63 |        |       | -0.15               | -0.77    |           |          | -0.31 | -0.46   |     |                |               |                 |                   |                    | Cytoplasm          |                                 |
| 1141 | 3-oxoacyl-[acyl-carrier-protein] reductase                                               | <i>fabG</i>    | 0    | -0.40 | 0      | 0.12  | -0.65               | -0.83    | -0.47     | -0.32    | -0.07 | -0.57   | *   |                |               |                 |                   |                    | Cytoplasm          |                                 |
| 1148 | 30S ribosomal protein S16                                                                | <i>rpsP</i>    | 0    | -0.01 | 0      | -0.39 | 0.13                | -0.14    | -0.42     | -0.44    | -0.10 | -0.22   |     |                |               |                 | Yes               |                    | Cytoplasm          |                                 |
| 1155 | Succinyl-CoA ligase [ADP-forming] subunit β                                              | <i>sucC</i>    | 0    | 0.02  | 0      | -0.38 | -0.40               | -0.59    | -0.56     | -0.85    | -0.09 | -0.60   | **  |                |               |                 |                   |                    | Cytoplasm          |                                 |
| 1156 | Succinyl-CoA ligase [ADP-forming] subunit α                                              | <i>sucD</i>    | 0    | 0.27  | 0      | -0.12 | -0.35               | -0.49    | 0.12      | -0.48    | 0.04  | -0.30   |     |                |               | x               |                   |                    | Cytoplasm          |                                 |
| 1165 | GTP-sensing transcriptional pleiotropic repressor                                        | <i>codY</i>    | 0    | -0.13 | 0      | 0.19  | 0.08                | -0.11    | 0.53      | 0.86     | 0.02  | 0.34    |     |                |               |                 |                   |                    | Cytoplasm          |                                 |

| NWMN | Protein name                                             | Gene        | wt I | wt II | wt III | wt IV | fold change (log 2) |                 |                  |                 |             |                       | P   | SignalP<br>[1] | Sec SP<br>[2] | No SP(*)<br>[2] | SecretomeP<br>[3] | Localization [4,5] |       |
|------|----------------------------------------------------------|-------------|------|-------|--------|-------|---------------------|-----------------|------------------|-----------------|-------------|-----------------------|-----|----------------|---------------|-----------------|-------------------|--------------------|-------|
|      |                                                          |             |      |       |        |       | <i>secDF I</i>      | <i>secDF II</i> | <i>secDF III</i> | <i>secDF IV</i> | $\sigma$ wt | $\sigma$ <i>secDF</i> |     |                |               |                 |                   |                    |       |
| 1166 | 30S ribosomal protein S2                                 | <i>rpsB</i> | 0    | -0.47 | 0      | -0.22 | -0.41               | -0.40           | -0.48            | -0.62           | -0.17       | -0.48                 |     |                |               |                 |                   | Cytoplasm          |       |
| 1167 | Elongation factor Ts                                     | <i>tsf</i>  | 0    | -0.12 | 0      | -0.45 | 0.08                | -0.07           | -0.06            | -0.13           | -0.14       | -0.05                 |     |                | x             |                 |                   | Cytoplasm          |       |
| 1169 | Ribosome-recycling factor                                | <i>frr</i>  | 0    | 0.06  | 0      | -0.44 | 0.02                | -0.22           | 0.28             | 0.04            | -0.09       | 0.03                  |     |                |               |                 |                   | Cytoplasm          |       |
| 1178 | Translation initiation factor IF-2                       | <i>infB</i> | 0    | -0.23 |        |       | -0.07               | 0.11            |                  |                 | -0.11       | 0.02                  |     |                |               |                 |                   | Cytoplasm          |       |
| 1181 | Polyribonucleotide nucleotidyltransferase                | <i>ribF</i> | 0    | -0.44 |        |       | -1.25               | -1.02           |                  |                 | -0.22       | -1.13                 |     |                |               |                 |                   | Cytoplasm          |       |
| 1182 | 30S ribosomal protein S15                                | <i>rpsO</i> | 0    | -0.28 |        |       | -0.39               | -0.50           |                  |                 | -0.14       | -0.44                 |     |                |               |                 |                   | Cytoplasm          |       |
| 1208 | Glycerol kinase                                          | <i>glpK</i> | 0    | 0.19  |        |       | -0.58               | -0.55           |                  |                 | 0.09        | -0.57                 |     |                |               |                 |                   | Cytoplasm          |       |
| 1217 | Glutamine synthetase                                     | <i>glnA</i> | 0    | -0.03 | 0      | 0.08  | 0.32                | 0.16            | 0.59             | 0.45            | 0.01        | 0.38                  | *   |                | x             |                 |                   | Cytoplasm          |       |
| 1236 | Thermonuclease                                           | <i>nuc</i>  | 0    | 0.00  | 0      | -0.21 | -0.57               | -0.63           | -0.33            | -0.66           | -0.05       | -0.55                 | **  |                |               |                 | Yes               | Extracellular      |       |
| 1246 | Catalase                                                 | <i>katA</i> | 0    | -0.04 | 0      | -0.42 | -0.57               | -0.75           | -0.79            | -0.81           | -0.11       | -0.73                 | **  |                | x             |                 | Yes               | Cytoplasm          |       |
| 1254 | Transketolase                                            | <i>tkt</i>  | 0    | -0.12 | 0      | -0.13 | -0.13               | -0.17           | -0.07            | -0.26           | -0.06       | -0.16                 |     |                | x             |                 | Yes               | Unknown            |       |
| 1263 | Aconitate hydratase                                      | <i>acnA</i> | 0    | -0.21 | 0      | -0.11 | -0.25               | -0.46           | -0.39            | -0.19           | -0.08       | -0.32                 | *   |                |               |                 | Yes               | Cytoplasm          |       |
| 1274 | Regulatory protein                                       | <i>msrR</i> | 0    | -0.02 | 0      | -0.19 | -1.46               | -1.00           | -1.04            | -1.14           | -0.05       | -1.16                 | *** |                |               |                 | Yes               | Membrane           |       |
| 1275 | 4-oxalocrotonate tautomerase                             | <i>1275</i> | 0    | 0.12  |        |       | 0.01                | -0.07           |                  |                 | 0.06        | -0.03                 |     |                |               |                 |                   | Cytoplasm          |       |
| 1313 | Cold shock protein                                       | <i>cspA</i> | 0    | -0.20 | 0      | -0.44 | 0.44                | 0.35            | 0.62             | 0.12            | -0.16       | 0.38                  | *   |                | x             |                 | Yes               | Cytoplasm          |       |
| 1332 | Probable CtpA-like serine protease                       | <i>1332</i> | 0    | -0.48 |        |       | -1.22               | -0.89           |                  |                 | -0.24       | -1.05                 |     |                |               |                 | Yes               | Membrane           |       |
| 1333 | Phosphotransferase system glucose-specific IIA component | <i>crr</i>  | 0    | -0.46 |        |       | -0.01               | -0.32           |                  |                 | -0.23       | -0.17                 |     |                |               |                 |                   | Cytoplasm          |       |
| 1339 | Conserved hypothetical protein                           | <i>1339</i> | 0    | 0.32  |        |       | -0.36               | -0.46           |                  |                 | 0.16        | -0.41                 |     |                |               |                 |                   | Cytoplasm          |       |
| 1365 | Asparaginyl-tRNA synthetase                              | <i>asnS</i> | 0    | -0.10 |        |       | -0.55               | -0.59           |                  |                 | -0.05       | -0.57                 | *   |                |               |                 |                   | Cytoplasm          |       |
| 1378 | Nucleoside diphosphate kinase                            | <i>ndk</i>  | 0    | -0.05 |        |       | -0.53               | -0.61           |                  |                 | -0.02       | -0.57                 | *   |                |               |                 |                   | Cytoplasm          |       |
| 1382 | DNA-binding protein HU                                   | <i>hup</i>  | 0    | 0.10  | 0      | -0.38 | 0.48                | 0.24            | 0.48             | 0.39            | -0.07       | 0.40                  | *   |                |               |                 |                   | Cytoplasm          |       |
| 1385 | 30S ribosomal protein S1                                 | <i>rpsA</i> | 0    | -0.09 | 0      | -0.37 | -0.42               | -0.55           | -0.15            | -0.33           | -0.11       | -0.36                 |     |                | x             |                 |                   | Cytoplasm          |       |
| 1386 | Cytidylate kinase                                        | <i>cmk</i>  | 0    | 0.34  |        |       | 0.86                | 0.17            |                  |                 | 0.17        | 0.52                  |     |                |               |                 |                   | Cytoplasm          |       |
| 1389 | Elastin-binding protein                                  | <i>ebpS</i> |      |       | 0      | -0.50 |                     |                 | -1.13            | -1.23           | -0.25       | -1.18                 |     |                | x             |                 | Yes               | Membrane           | MLS   |
| 1417 | 6-phosphogluconate dehydrogenase, decarboxylating        | <i>gnd</i>  | 0    | 0.00  |        |       | 0.24                | -0.10           |                  |                 | 0.00        | 0.07                  |     |                | x             |                 |                   | Cytoplasm          |       |
| 1456 | Superoxide dismutase [Mn/Fe]                             | <i>sodA</i> | 0    | 0.26  | 0      | -0.48 | -0.26               | -0.24           | -0.21            | -0.43           | -0.06       | -0.28                 |     |                | x             |                 | Yes               | Extracellular      | No SP |
| 1468 | Glycyl-tRNA synthetase                                   | <i>glyS</i> | 0    | 0.07  | 0      | -0.07 | 0.30                | 0.06            | -0.14            | -0.08           | 0.00        | 0.04                  |     |                |               |                 |                   | Cytoplasm          |       |
| 1483 | Chaperone protein                                        | <i>dnaK</i> | 0    | 0.02  | 0      | -0.40 | 0.12                | 0.02            | 0.14             | 0.07            | -0.10       | 0.09                  |     |                | x             |                 | Yes               | Cytoplasm          |       |
| 1484 | Hsp-70 cofactor                                          | <i>grpE</i> | 0    | 0.08  | 0      | -0.43 | -0.51               | -0.57           | -0.09            | -0.35           | -0.09       | -0.38                 |     |                | x             |                 | Yes               | Cytoplasm          |       |
| 1488 | 30S ribosomal protein S20                                | <i>rpsT</i> | 0    | -0.37 |        |       | -0.59               | -0.95           |                  |                 | -0.19       | -0.77                 |     |                |               |                 | Yes               | Cytoplasm          |       |
| 1516 | Conserved hypothetical protein                           | <i>1516</i> | 0    | 0.00  |        |       | 0.14                | -0.02           |                  |                 | 0.00        | 0.06                  |     |                |               |                 |                   | Cytoplasm          |       |
| 1547 | 50S ribosomal protein L27                                | <i>rpmA</i> | 0    | 0.14  | 0      | -0.53 | -0.02               | -0.10           | -0.42            | -0.47           | -0.10       | -0.25                 |     |                |               |                 | Yes               | Cytoplasm          |       |
| 1549 | 50S ribosomal protein L21                                | <i>rplU</i> | 0    | 0.14  | 0      | -0.97 | -0.77               | -0.36           | -0.55            | -0.92           | -0.21       | -0.65                 |     |                |               |                 |                   | Cytoplasm          |       |
| 1558 | Valyl-tRNA synthetase                                    | <i>valS</i> | 0    | 0.35  |        |       | 0.19                | -0.13           |                  |                 | 0.18        | 0.03                  |     |                |               |                 |                   | Cytoplasm          |       |
| 1569 | Trigger factor                                           | <i>tig</i>  | 0    | -0.13 | 0      | -0.21 | -0.03               | -0.23           | -0.40            | -0.40           | -0.09       | -0.26                 |     |                | x             |                 |                   | Cytoplasm          |       |
| 1574 | Translation initiation factor IF-3                       | <i>infC</i> | 0    | -0.23 |        |       | -1.13               | -0.50           |                  |                 | -0.12       | -0.81                 |     |                |               |                 |                   | Cytoplasm          |       |
| 1576 | Threonyl-tRNA synthetase                                 | <i>thrS</i> | 0    | 0.19  |        |       | 0.03                | -0.48           |                  |                 | 0.09        | -0.23                 |     |                |               |                 |                   | Cytoplasm          |       |
| 1587 | Isocitrate dehydrogenase [NADP]                          | <i>citC</i> | 0    | -0.11 | 0      | -0.35 | -0.51               | -0.71           | -0.49            | -1.00           | -0.11       | -0.68                 | **  |                |               |                 |                   | Cytoplasm          |       |

| NWMN | Protein name                                                      | Gene           | wt I | wt II | wt III | wt IV | fold change (log 2) |          |           |          | σ wt  | σ secDF | P   | SignalP<br>[1] | Sec SP<br>[2] | No SP(*)<br>[2] | SecretomeP<br>[3] | Localization [4,5] |                    |                                     |
|------|-------------------------------------------------------------------|----------------|------|-------|--------|-------|---------------------|----------|-----------|----------|-------|---------|-----|----------------|---------------|-----------------|-------------------|--------------------|--------------------|-------------------------------------|
|      |                                                                   |                |      |       |        |       | secDF I             | secDF II | secDF III | secDF IV |       |         |     |                |               |                 |                   |                    |                    |                                     |
| 1592 | Pyruvate kinase                                                   | <i>pyk</i>     | 0    | -0.32 |        |       | -0.72               | -0.60    |           |          |       |         |     |                |               |                 |                   |                    | Cytoplasm          |                                     |
| 1593 | 6-phosphofructokinase                                             | <i>pfk</i>     | 0    | -0.14 | 0      | -0.35 | -0.56               | -0.23    | -0.40     | -0.24    | -0.12 | -0.36   |     |                |               |                 |                   |                    | Cytoplasm          |                                     |
| 1601 | Metal-dependent hydrolase                                         | <i>1601</i>    | 0    | 0.93  |        |       | 0.81                | -0.03    |           |          | 0.46  | 0.39    |     |                |               |                 |                   |                    | Cytoplasm          |                                     |
| 1604 | Universal stress protein family protein                           | <i>1604</i>    | 0    | -0.07 | 0      | -0.40 | -0.19               | -0.25    | -0.43     | -0.31    | -0.12 | -0.29   |     |                |               | x               |                   |                    | Cytoplasm          |                                     |
| 1609 | Probable thiol peroxidase                                         | <i>thil</i>    | 0    | -0.04 | 0      | -0.09 | -0.25               | -0.23    | 0.24      | -0.32    | -0.03 | -0.14   |     |                |               |                 |                   |                    | Cytoplasm          |                                     |
| 1613 | 30S ribosomal protein S4                                          | <i>rpsd</i>    | 0    | 0.13  |        |       | 0.05                | -0.09    |           |          | 0.07  | -0.02   |     |                |               |                 |                   |                    | Cytoplasm          |                                     |
| 1625 | Formate--tetrahydrofolate ligase                                  | <i>fhs</i>     | 0    | 0.25  | 0      | -0.39 | -0.21               | -0.25    | -0.18     | -0.45    | -0.04 | -0.27   |     |                |               | x               |                   |                    | Cytoplasm          |                                     |
| 1643 | D-alanine aminotransferase                                        | <i>dat</i>     | 0    | -0.28 |        |       | 0.29                | 0.44     |           |          | -0.14 | 0.36    |     |                |               |                 |                   |                    | Cytoplasm          |                                     |
| 1681 | Phosphoenolpyruvate carboxykinase [ATP]                           | <i>pckA</i>    | 0    | -0.11 |        |       | -0.75               | -0.85    |           |          | -0.05 | -0.80   | **  |                |               |                 |                   | Yes                | Cytoplasm          |                                     |
| 1726 | Signal transduction protein TRAP (RNAIII-activating protein TRAP) | <i>traP</i>    | 0    | -0.08 |        |       | -0.18               | -0.56    |           |          | -0.04 | -0.37   |     |                |               | x               |                   | Yes                | Cytoplasm          |                                     |
| 1733 | Foldase protein                                                   | <i>prsA</i>    | 0    | 0.01  | 0      | -0.31 | -0.49               | -0.49    | -0.66     | -0.82    | -0.08 | -0.62   | **  | Yes            |               |                 |                   | Yes                | Lipoprotein        |                                     |
| 1737 | Conserved hypothetical protein                                    | <i>1737</i>    | 0    | 0.23  | 0      | -0.40 | 0.83                | 0.71     | -0.14     | -0.03    | -0.04 | 0.34    |     |                |               |                 |                   |                    | Cytoplasm          |                                     |
| 1767 | ThiJ/Pfpl family protein                                          | <i>1767</i>    | 0    | -0.19 | 0      | -0.58 | -0.36               | -0.68    | -0.56     | -0.71    | -0.19 | -0.58   |     |                |               |                 |                   |                    | Cytoplasm          |                                     |
| 1831 | Ferritin                                                          | <i>ftnA</i>    | 0    | 0.31  | 0      | -0.25 | -0.20               | -0.49    | -0.36     | -0.22    | 0.01  | -0.31   |     |                |               |                 |                   |                    | Cytoplasm          |                                     |
| 1837 | Aspartyl/glutamyl-tRNA(Asn/Gln) amidotransferase subunit B        | <i>gatB</i>    | 0    | -0.37 | 0      | -0.74 | -0.23               | -0.56    | -0.05     | -0.24    | -0.28 | -0.27   |     |                |               |                 |                   |                    | Cytoplasm          |                                     |
| 1838 | Glutamyl-tRNA(Gln) amidotransferase subunit A                     | <i>gatA</i>    | 0    | 0.16  |        |       | 0.62                | 0.34     |           |          | 0.08  | 0.48    |     |                |               |                 |                   | Yes                | Cytoplasm          |                                     |
| 1839 | Aspartyl/glutamyl-tRNA(Asn/Gln) amidotransferase subunit C        | <i>gatC</i>    | 0    | 0.23  | 0      | 0.03  | -0.40               | -0.51    | -0.55     | -0.62    | 0.06  | -0.52   | *** |                |               |                 |                   | Yes                | Cytoplasm          |                                     |
| 1847 | Staphopain thiol protease                                         | <i>scpA</i>    | 0    | -0.23 |        |       | -2.14               | -2.22    |           |          | -0.12 | -2.18   | *   | Yes            | Yes           |                 |                   | Yes                | Extracellular      |                                     |
| 1857 | Probable manganese-dependent inorganic pyrophosphatase            | <i>ppaC</i>    | 0    | -0.07 | 0      | -0.03 | -1.00               | -0.38    | -2.13     | -2.27    | -0.03 | -1.45   |     |                |               |                 |                   |                    | Cytoplasm          |                                     |
| 1859 | Conserved hypothetical protein                                    | <i>1859</i>    | 0    | -0.77 |        |       | -0.91               | -1.13    |           |          | -0.38 | -1.02   |     |                |               | x               |                   |                    | Cytoplasm          |                                     |
| 1872 | 65 kDa membrane protein                                           | <i>eap/map</i> | 0    | -0.42 | 0      | -0.27 | -1.79               | -1.61    | -2.06     | -2.21    | -0.17 | -1.92   | *** | Yes            | Yes           |                 |                   | Yes                | Extracellular / CW | Can re-bind to CW, non-cov. [8]     |
| 1876 | Staphylococcal complement inhibitor                               | <i>scn</i>     | 0    | 0.20  | 0      | -0.05 | -1.65               | -1.66    | -3.18     | -3.46    | 0.04  | -2.49   | *   | Yes            | Yes           |                 |                   | Yes                | Extracellular      |                                     |
| 1877 | Chemotaxis inhibitory protein                                     | <i>chp</i>     | 0    | 0.47  | 0      | 0.63  | -2.52               | -2.29    | -1.25     | -1.62    | 0.28  | -1.92   | **  | Yes            | Yes           |                 |                   | Yes                | Extracellular      |                                     |
| 1880 | Staphylokinase                                                    | <i>sak</i>     | 0    | 0.08  | 0      | -0.48 | -0.87               | -0.87    | -0.79     | -0.82    | -0.10 | -0.84   | **  | Yes            | Yes           |                 |                   | Yes                | Extracellular      |                                     |
| 1883 | Enterotoxin type A                                                | <i>sea</i>     | 0    | 0.05  | 0      | -0.08 | -1.95               | -1.89    | -1.29     | -1.40    | -0.01 | -1.63   | **  | Yes            |               |                 |                   | Yes                | Extracellular      |                                     |
| 1927 | Leukocidin/hemolysin toxin family F subunit                       | <i>lukF</i>    | 0    | 0.12  | 0      | -0.21 | -0.42               | -0.54    | -1.09     | -0.87    | -0.02 | -0.73   | *   | Yes            | Yes           |                 |                   | Yes                | Extracellular      |                                     |
| 1928 | Leukocidin/hemolysin toxin family S subunit                       | <i>lukS</i>    | 0    | -0.03 | 0      | -0.31 | -1.42               | -1.70    | -1.16     | -1.14    | -0.09 | -1.36   | *** | Yes            | Yes           |                 |                   | Yes                | Extracellular      |                                     |
| 1937 | Chaperonin 60 kDa subunit                                         | <i>groEL</i>   | 0    | 0.03  | 0      | -0.61 | -0.28               | -0.51    | -0.41     | -0.47    | -0.15 | -0.42   |     |                |               | x               |                   |                    | Cytoplasm          |                                     |
| 1938 | 10 kDa chaperonin                                                 | <i>groES</i>   |      |       | 0      | -0.79 |                     |          | -0.41     | -0.69    | -0.40 | -0.55   |     |                |               | x               |                   |                    | Cytoplasm          |                                     |
| 1972 | Anti-sigma-B factor antagonist                                    | <i>rsbV</i>    | 0    | -0.15 | 0      | -0.11 | -0.79               | -0.87    | -0.29     | -0.09    | -0.07 | -0.51   |     |                |               |                 |                   |                    | Cytoplasm          |                                     |
| 1999 | Probable transglycosylase                                         | <i>sceD</i>    | 0    | 0.09  | 0      | -0.49 | 1.81                | 1.81     | 1.60      | 1.38     | -0.10 | 1.65    | *** | Yes            | Yes           |                 |                   | Yes                | Extracellular      | Can ionically bind to cell wall [9] |
| 2004 | UDP-N-acetylglucosamine 1-carboxyvinyltransferase 1               | <i>murA1</i>   | 0    | 1.01  |        |       | -1.90               | -0.17    |           |          | 0.51  | -1.03   |     |                |               |                 |                   |                    | Cytoplasm          |                                     |
| 2007 | ATP synthase subunit beta                                         | <i>atpD</i>    | 0    | -0.18 |        |       | -0.47               | -0.74    |           |          | -0.09 | -0.60   |     |                |               |                 |                   |                    | Cytoplasm          |                                     |

| NWMN | Protein name                                                     | Gene         | fold change (log 2) |       |        |       |         |          |           |          |      |         | P     | SignalP<br>[1] | Sec SP<br>[2] | No SP(*)<br>[2] | SecretomeP<br>[3] | Localization [4,5] |     |               |                                     |
|------|------------------------------------------------------------------|--------------|---------------------|-------|--------|-------|---------|----------|-----------|----------|------|---------|-------|----------------|---------------|-----------------|-------------------|--------------------|-----|---------------|-------------------------------------|
|      |                                                                  |              | wt I                | wt II | wt III | wt IV | secDF I | secDF II | secDF III | secDF IV | ø wt | ø secDF |       |                |               |                 |                   |                    |     |               |                                     |
| 2009 | ATP synthase subunit alpha                                       | <i>atpA</i>  | 0                   | -0.08 |        |       | 0.08    | -0.30    |           |          |      |         | -0.04 | -0.11          |               |                 |                   |                    |     | Cytoplasm     |                                     |
| 2016 | Uracil phosphoribosyltransferase                                 | <i>upp</i>   | 0                   | -0.41 |        |       | -0.09   | -0.14    |           |          |      |         | -0.21 | -0.11          |               |                 |                   |                    |     | Cytoplasm     |                                     |
| 2024 | 50S ribosomal protein L31 type B                                 | <i>rpmE</i>  | 0                   | -0.08 | 0      | -0.36 | -0.25   | -0.48    | -0.25     | -0.58    |      |         | -0.11 | -0.39          |               |                 |                   | Yes                |     | Cytoplasm     |                                     |
| 2026 | Putative aldehyde dehydrogenase                                  | <i>2026</i>  | 0                   | -0.21 |        |       | -0.29   | -0.55    |           |          |      |         | -0.11 | -0.42          |               |                 |                   |                    |     | Cytoplasm     |                                     |
| 2029 | Fructose-bisphosphate aldolase                                   | <i>fbaA</i>  | 0                   | -0.23 | 0      | -0.24 | 0.10    | -0.06    | -0.27     | -0.18    |      |         | -0.12 | -0.10          |               |                 | x                 |                    |     | Cytoplasm     |                                     |
| 2031 | CTP synthase                                                     | <i>pyrG</i>  | 0                   | 0.12  |        |       | -0.28   | 0.52     |           |          |      |         | 0.06  | 0.12           |               |                 |                   |                    |     | Cytoplasm     |                                     |
| 2032 | Probable DNA-directed RNA polymerase subunit delta               | <i>rpoE</i>  | 0                   | -0.11 |        |       | -0.06   | -0.33    |           |          |      |         | -0.06 | -0.20          |               |                 |                   | Yes                |     | Cytoplasm     |                                     |
| 2041 | Deoxyribose-phosphate aldolase 1                                 | <i>deoC</i>  | 0                   | -0.43 |        |       | -0.63   | -0.47    |           |          |      |         | -0.21 | -0.55          |               |                 |                   |                    |     | Cytoplasm     |                                     |
| 2056 | Glucosamine--fructose-6-phosphate aminotransferase [isomerizing] | <i>glmS</i>  | 0                   | 0.04  |        |       | 0.51    | -0.30    |           |          |      |         | 0.02  | 0.11           |               |                 |                   |                    |     | Cytoplasm     |                                     |
| 2062 | Phosphoglucosamine mutase                                        | <i>glmM</i>  | 0                   | 0.10  |        |       | 0.07    | -0.11    |           |          |      |         | 0.05  | -0.02          |               |                 |                   |                    |     | Cytoplasm     |                                     |
| 2074 | Conserved hypothetical protein                                   | <i>2074</i>  | 0                   | 0.13  |        |       | -0.33   | -0.36    |           |          |      |         | 0.06  | -0.34          |               |                 | x                 | Yes                |     | Unknown       |                                     |
| 2086 | Alkaline shock protein 23                                        | <i>asp23</i> | 0                   | 0.06  | 0      | -0.18 | -0.55   | -0.97    | -0.65     | -0.50    |      |         | -0.03 | -0.67          | **            |                 | x                 | Yes                |     | Unknown       |                                     |
| 2119 | 30S ribosomal protein S9                                         | <i>rpsI</i>  |                     |       | 0      | -0.66 |         |          | -0.30     | -0.95    |      |         | -0.33 | -0.63          |               |                 |                   |                    |     | Cytoplasm     |                                     |
| 2120 | 50S ribosomal protein L13                                        | <i>rplM</i>  | 0                   | -0.06 | 0      | -0.51 | -0.33   | -0.41    | -0.49     | -0.56    |      |         | -0.14 | -0.45          |               |                 | x                 | Yes                |     | Cytoplasm     |                                     |
| 2125 | 50S ribosomal protein L17                                        | <i>rplQ</i>  | 0                   | 0.02  | 0      | -0.24 | 0.04    | -0.06    | -0.19     | -0.34    |      |         | -0.06 | -0.14          |               |                 |                   |                    |     | Cytoplasm     |                                     |
| 2126 | DNA-directed RNA polymerase subunit alpha                        | <i>rpoA</i>  | 0                   | -0.02 |        |       | -0.14   | -0.06    |           |          |      |         | -0.01 | -0.10          |               |                 |                   |                    |     | Cytoplasm     |                                     |
| 2127 | 30S ribosomal protein S11                                        | <i>rpsK</i>  | 0                   | 0.11  |        |       | -0.23   | -0.29    |           |          |      |         | 0.06  | -0.26          |               |                 |                   | Yes                |     | Cytoplasm     |                                     |
| 2128 | 30S ribosomal protein S13                                        | <i>rpsM</i>  |                     |       | 0      | -0.06 |         |          | 0.36      | 0.54     |      |         | -0.03 | 0.45           |               |                 |                   |                    |     | Cytoplasm     |                                     |
| 2130 | Translation initiation factor IF-1                               | <i>infA</i>  | 0                   | -0.64 | 0      | -0.10 | 0.52    | 0.35     | 0.88      | 0.88     |      |         | -0.18 | 0.66           | **            |                 |                   |                    |     | Cytoplasm     |                                     |
| 2131 | Adenylate kinase                                                 | <i>adk</i>   | 0                   | -0.02 | 0      | -0.31 | 0.24    | 0.05     | -0.06     | -0.33    |      |         | -0.08 | -0.03          |               |                 |                   |                    |     | Cytoplasm     |                                     |
| 2133 | 50S ribosomal protein L15                                        | <i>rplO</i>  | 0                   | -0.01 | 0      | -0.40 | -0.29   | -0.37    | -1.00     | -0.81    |      |         | -0.10 | -0.62          | *             |                 |                   |                    |     | Cytoplasm     |                                     |
| 2134 | 50S ribosomal protein L30                                        | <i>rpmD</i>  | 0                   | 0.02  |        |       | -0.02   | -0.13    |           |          |      |         | 0.01  | -0.08          |               |                 |                   | Yes                |     | Cytoplasm     |                                     |
| 2135 | 30S ribosomal protein S5                                         | <i>rpsE</i>  | 0                   | 0.02  | 0      | -0.77 | -0.07   | -0.23    | 0.27      | 0.01     |      |         | -0.19 | -0.01          |               |                 |                   |                    |     | Cytoplasm     |                                     |
| 2137 | 50S ribosomal protein L6                                         | <i>rplF</i>  | 0                   | 0.00  | 0      | -0.29 | 0.19    | 0.13     | 0.09      | 0.17     |      |         | -0.07 | 0.15           |               |                 |                   | Yes                |     | Cytoplasm     |                                     |
| 2138 | 30S ribosomal protein S8                                         | <i>rpsH</i>  | 0                   | 0.22  | 0      | -0.62 | -0.03   | 0.09     | -0.26     | -0.20    |      |         | -0.10 | -0.10          |               |                 |                   |                    |     | Cytoplasm     |                                     |
| 2140 | 50S ribosomal protein L5                                         | <i>rplE</i>  | 0                   | 0.05  | 0      | -0.53 | -0.04   | -0.05    | -0.42     | -0.05    |      |         | -0.12 | -0.14          |               |                 |                   |                    |     | Cytoplasm     |                                     |
| 2141 | 50S ribosomal protein L24                                        | <i>rplX</i>  | 0                   | 0.20  |        |       | 0.27    | 0.09     |           |          |      |         | 0.10  | 0.18           |               |                 |                   | Yes                |     | Cytoplasm     |                                     |
| 2143 | 30S ribosomal protein S17                                        | <i>rpsQ</i>  | 0                   | 0.07  |        |       | 0.05    | 0.14     |           |          |      |         | 0.04  | 0.09           |               |                 |                   | Yes                |     | Cytoplasm     |                                     |
| 2144 | 50S ribosomal protein L29                                        | <i>rpmC</i>  | 0                   | 0.05  | 0      | -0.44 | -0.25   | -0.24    | 0.07      | -0.08    |      |         | -0.10 | -0.13          |               |                 |                   |                    |     | Cytoplasm     |                                     |
| 2145 | 50S ribosomal protein L16                                        | <i>rplP</i>  | 0                   | -0.51 |        |       | -0.98   | -0.79    |           |          |      |         | -0.25 | -0.88          |               |                 |                   |                    |     | Cytoplasm     |                                     |
| 2146 | 30S ribosomal protein S3                                         | <i>rpsC</i>  | 0                   | 0.08  |        |       | 0.05    | -0.15    |           |          |      |         | 0.04  | -0.05          |               |                 |                   |                    |     | Cytoplasm     |                                     |
| 2147 | 50S ribosomal protein L22                                        | <i>rplV</i>  | 0                   | 0.13  | 0      | -0.65 | -0.73   | -0.40    | -0.28     | -0.42    |      |         | -0.13 | -0.46          |               |                 |                   |                    |     | Cytoplasm     |                                     |
| 2148 | 30S ribosomal protein S19                                        | <i>rpsS</i>  | 0                   | 0.13  | 0      | -0.28 | -0.46   | -0.48    | -0.26     | -0.53    |      |         | -0.04 | -0.43          | *             |                 |                   |                    |     | Cytoplasm     |                                     |
| 2149 | 50S ribosomal protein L2                                         | <i>rplB</i>  | 0                   | -0.19 | 0      | -0.21 | 0.05    | -0.05    | -0.22     | -0.31    |      |         | -0.10 | -0.13          |               |                 |                   |                    |     | Cytoplasm     |                                     |
| 2150 | 50S ribosomal protein L23                                        | <i>rplW</i>  | 0                   | 0.21  |        |       | 0.66    | 0.42     |           |          |      |         | 0.11  | 0.54           |               |                 |                   |                    |     | Cytoplasm     |                                     |
| 2151 | 50S ribosomal protein L4                                         | <i>rplD</i>  | 0                   | -0.93 |        |       | -0.60   | -1.20    |           |          |      |         | -0.47 | -0.90          |               |                 |                   |                    |     | Cytoplasm     |                                     |
| 2199 | Staphylococcal secretory antigen                                 | <i>ssaA</i>  | 0                   | 0.05  | 0      | -0.06 | -1.95   | -1.80    | -1.75     | -1.55    |      |         | 0.00  | -1.76          | ***           | Yes             | Yes               |                    | Yes | Extracellular | Can ionically bind to cell wall [9] |

| NWMN | Protein name                                    | Gene        | wt I | wt II | wt III | wt IV | fold change (log 2) |                 |                  |                 |             |                       | P   | SignalP<br>[1] | Sec SP<br>[2] | No SP(*)<br>[2] | SecretomeP<br>[3] | Localization [4,5]                                   |
|------|-------------------------------------------------|-------------|------|-------|--------|-------|---------------------|-----------------|------------------|-----------------|-------------|-----------------------|-----|----------------|---------------|-----------------|-------------------|------------------------------------------------------|
|      |                                                 |             |      |       |        |       | <i>secDF I</i>      | <i>secDF II</i> | <i>secDF III</i> | <i>secDF IV</i> | $\sigma$ wt | $\sigma$ <i>secDF</i> |     |                |               |                 |                   |                                                      |
| 2205 | Putative 2-hydroxyacid dehydrogenase            | 2205        | 0    | -0.50 | 0      | -0.60 | -0.12               | -0.43           | -0.25            | -0.66           | -0.27       | -0.36                 |     |                |               |                 |                   | Cytoplasm                                            |
| 2270 | Conserved hypothetical protein                  | 2270        | 0    | -0.24 | 0      | 0.04  | -0.47               | -1.03           | -0.65            | -1.06           | -0.05       | -0.80                 | **  | Yes            |               |                 | Yes               | Lipoprotein<br>MLS                                   |
| 2317 | Immunoglobulin-binding protein                  | <i>sbi</i>  | 0    | -0.03 | 0      | -0.16 | -1.33               | -1.23           | -1.20            | -1.22           | -0.05       | -1.25                 | *** | Yes            | Yes           |                 | Yes               | Extracellular                                        |
| 2318 | Gamma-hemolysin component A                     | <i>hlgA</i> | 0    | -0.03 | 0      | -0.33 | -0.09               | -0.23           | -0.67            | -0.87           | -0.09       | -0.46                 |     | Yes            | Yes           |                 | Yes               | Extracellular                                        |
| 2319 | Gamma-hemolysin component C                     | <i>hlgC</i> | 0    | 0.08  | 0      | -0.26 | -0.32               | -0.88           | -1.00            | -0.99           | -0.04       | -0.79                 | *   | Yes            | Yes           |                 | Yes               | Extracellular                                        |
| 2320 | Gamma-hemolysin component B                     | <i>hlgB</i> | 0    | -0.20 | 0      | -0.23 | -0.30               | -0.58           | -0.50            | -0.78           | -0.11       | -0.54                 | *   | Yes            | Yes           |                 | Yes               | Extracellular                                        |
| 2399 | Fibronectin-binding protein A                   | <i>fnbA</i> | 0    | -0.08 | 0      | -0.07 | -2.01               | -1.92           | -2.78            | -2.78           | -0.04       | -2.37                 | **  | Yes            | Yes           |                 | Yes               | Cell wall<br>Sortase substrate <sup>1</sup>          |
| 2448 | ATP-dependent Clp protease, ATP-binding subunit | <i>clpL</i> | 0    | 0.11  |        |       | -0.71               | -0.88           |                  |                 | 0.05        | -0.80                 | *   |                |               |                 | Yes               | Cytoplasm<br>MLS                                     |
| 2454 | 1-pyrroline-5-carboxylate dehydrogenase         | <i>rocA</i> | 0    | -0.21 | 0      | -0.58 | -0.67               | -0.81           | -0.76            | -0.84           | -0.20       | -0.77                 | *   |                |               | x               |                   | Cytoplasm                                            |
| 2467 | O-acetyltransferase                             | <i>oatA</i> | 0    | 0.35  | 0      | -0.23 | -1.07               | -1.00           | -1.13            | -1.32           | 0.03        | -1.13                 | *** |                |               |                 | Yes               | Membrane                                             |
| 2469 | Probable transglycosylase                       | <i>isaA</i> | 0    | -0.11 | 0      | -0.04 | -1.83               | -1.87           | -1.43            | -1.35           | -0.04       | -1.62                 | **  | Yes            | Yes           |                 | Yes               | Extracellular<br>Can ionically bind to cell wall [9] |
| 2480 | Alpha/beta hydrolase fold family protein        | 2480        | 0    | -0.04 |        |       | -0.52               | -0.22           |                  |                 | -0.02       | -0.37                 |     |                |               |                 | Yes               | Cytoplasm                                            |
| 2503 | Fructose-bisphosphate aldolase class 1          | <i>fda</i>  | 0    | -0.03 | 0      | -0.39 | 0.37                | 0.49            | 0.24             | 0.10            | -0.10       | 0.30                  | *   |                |               | x               |                   | Cytoplasm                                            |
| 2504 | Probable malate:quinone oxidoreductase 2        | <i>mqa2</i> | 0    | 0.31  |        |       | -0.52               | -0.54           |                  |                 | 0.15        | -0.53                 |     |                |               |                 |                   | Cytoplasm<br>MLS                                     |
| 2529 | Clumping factor B                               | <i>clfB</i> | 0    | -0.17 | 0      | -0.30 | -2.58               | -2.64           | -1.55            | -1.80           | -0.12       | -2.15                 | **  | yes            | Yes           |                 | yes               | Cell wall<br>Sortase substrate                       |
| 2537 | Immunodominant staphylococcal antigen B         | <i>isaB</i> | 0    | -0.05 | 0      | -0.07 | -0.60               | -0.56           | -1.09            | -1.40           | -0.03       | -0.91                 | *   | yes            | Yes           |                 | yes               | Extracellular                                        |
| 2569 | Lipase 1                                        | <i>lip</i>  | 0    | 0.27  | 0      | -0.15 | -0.68               | -0.80           | -0.54            | -0.69           | 0.03        | -0.67                 | **  | yes            | Yes           |                 | yes               | Extracellular                                        |
| 2624 | Delta-hemolysin                                 | <i>hld</i>  | 0    | -0.78 | 0      | -1.09 | -2.17               | -2.12           | -1.95            | -2.12           | -0.47       | -2.09                 | **  |                |               |                 |                   | Extracellular<br>No SP                               |

(\*) Extracellular, without known signal peptide; MLS, multiple localization sites; <sup>1</sup>, FnbPA is truncated due to a point mutation leading to a stop codon. Thus it lacks the sortase motif LPXTG and is entirely secreted [10]; \*,  $P < 0.05$ ; \*\*,  $P < 0.01$ ; \*\*\*  $P < 0.001$ .

- Petersen TN, Brunak S, von Heijne G, Nielsen H (2011) SignalP 4.0: discriminating signal peptides from transmembrane regions. *Nat Methods* 8: 785-786.
- Sibbald MJJB, Ziebandt AK, Engelmann S, Hecker M, de Jong A, et al. (2006) Mapping the pathways to staphylococcal pathogenesis by comparative secretomics. *Microbiol Mol Biol Rev* 70: 755-788.
- Bendtsen J, Kiemer L, Fausboll A, Brunak S (2005) Non-classical protein secretion in bacteria. *BMC Microbiol* 5: 58.
- Yu NY, Wagner JR, Laird MR, Melli G, Rey S, et al. (2010) PSORTb 3.0: improved protein subcellular localization prediction with refined localization subcategories and predictive capabilities for all prokaryotes. *Bioinformatics* 26: 1608-1615.
- Krogh A, Larsson Br, von Heijne G, Sonnhammer ELL (2001) Predicting transmembrane protein topology with a hidden markov model: application to complete genomes. *J Mol Biol* 305: 567-580.
- Buist G, Steen A, Kok J, Kuipers OP (2008) LysM, a widely distributed protein motif for binding to (peptido)glycans. *Mol Microbiol* 68: 838-847.
- Chavakis T, Wiechmann K, Preissner KT, Herrmann M (2005) *Staphylococcus aureus* interactions with the endothelium: the role of bacterial "secretable expanded repertoire adhesive molecules" (SERAM) in disturbing host defense systems. *Thromb Haemost* 94: 278-285.
- Palma M, Hagggar A, Flock J-I (1999) Adherence of *Staphylococcus aureus* is enhanced by an endogenous secreted protein with broad binding activity. *J Bacteriol* 181: 2840-2845.
- Stapleton MR, Horsburgh MJ, Hayhurst EJ, Wright L, Jonsson I-M, et al. (2007) Characterization of IsaA and SceD, two putative lytic transglycosylases of *Staphylococcus aureus*. *J Bacteriol* 189: 7316-7325.
- Grundmeier M, Hussain M, Becker P, Heilmann C, Peters G, et al. (2004) Truncation of fibronectin-binding proteins in *Staphylococcus aureus* strain Newman leads to deficient adherence and host cell invasion due to loss of the cell wall anchor function. *Infect Immun* 72: 7155-7163.
